# Supplementary material
Source: PubMed Central journal article supplement (PMC4362724)

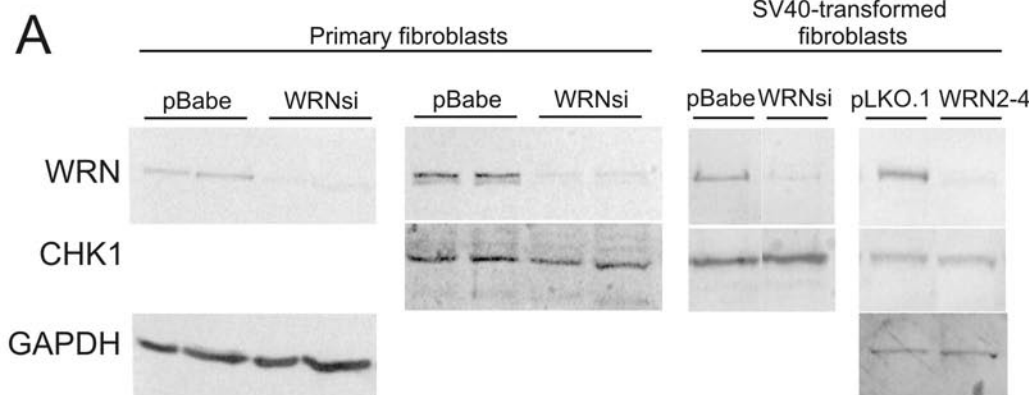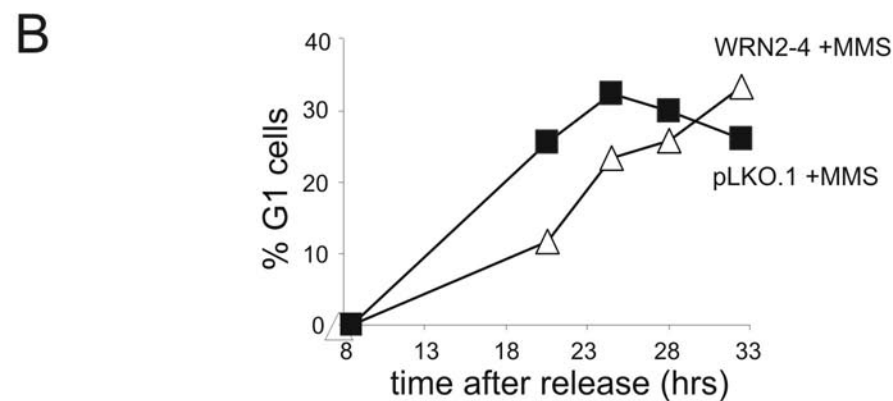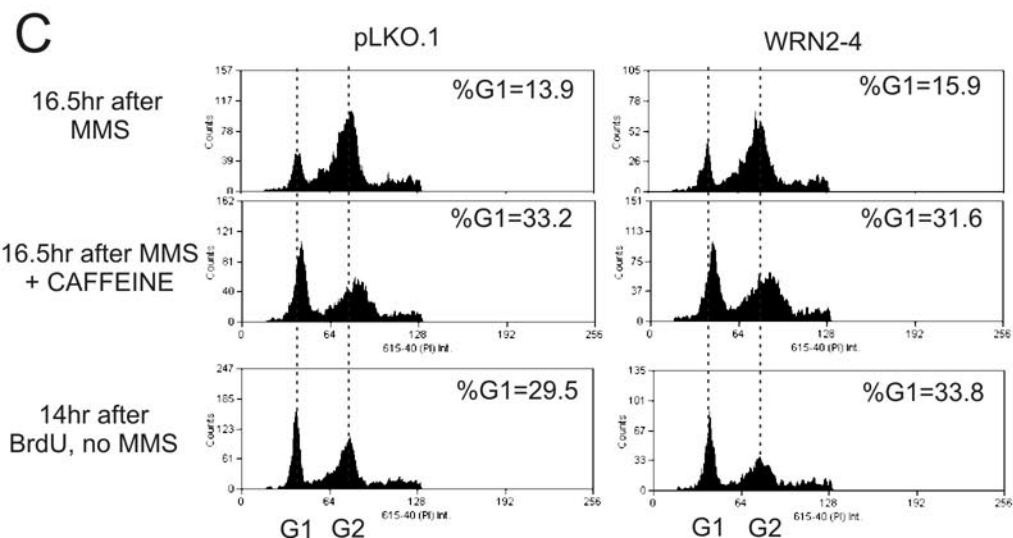

Supplement: NIHMS669583-supplement-Suppl__Info_.pdf [file NIHMS669583-supplement-Suppl__Info_.pdf]
